# Supplementary material for: Fiber and fabric solar cells by directly weaving carbon nanotube yarns with CdSe nanowire-based electrodes
Source: Royal Society of Chemistry journal article supplement (doi:10.1039/c2nr31440a), 2012-01-01
Supplement: c2nr31440a.pdf [file c2nr31440a.pdf]

# **Fabric Solar Cells by Directly Weaving Carbon Nanotube Yarns with CdSe Nanowire-Based Electrodes**

Luhui Zhang,<sup>1</sup> Enzheng Shi,<sup>1</sup> Chunyan Ji,<sup>1</sup> Zhen Li,<sup>2</sup> Peixu Li,<sup>2</sup> Yuanyuan Shang,<sup>3</sup> Yibin Li,<sup>3</sup>

Jinquan Wei,<sup>2</sup> Kunlin Wang,<sup>2</sup> Hongwei Zhu,<sup>2</sup> Dehai Wu,<sup>2</sup> Anyuan Cao<sup>1\*</sup>

<sup>1</sup> Department of Materials Science and Engineering, College of Engineering, Peking University, Beijing  
100871, P. R. China

<sup>2</sup> Key Laboratory for Advanced Materials Processing Technology and Department of Mechanical Engineering,  
Tsinghua University, Beijing 100084, P. R. China

<sup>3</sup> Centre for Composite Materials and Structures, Harbin Institute of Technology, Harbin 150080, P. R. China

\*Corresponding authors. Email: [anyuan@pku.edu.cn](mailto:anyuan@pku.edu.cn)

## **Supporting Information:**

- 1. Figure S1. Morphology characterization, mechanical and electrical properties of CNT yarns.**

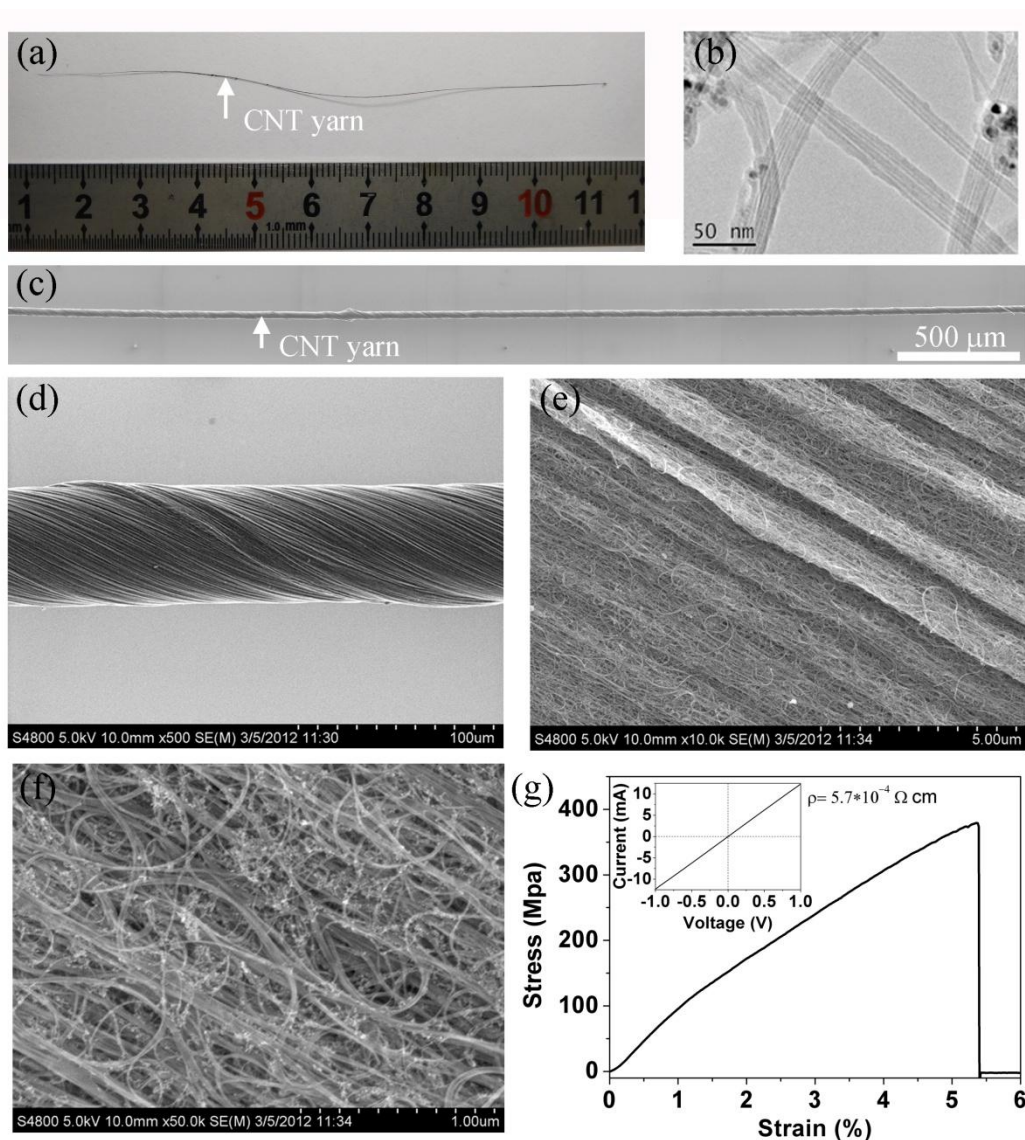

**Figure S1.** Morphology characterization, mechanical and electrical properties of CNT yarns. (a) Photo of a freestanding 10 cm-long CNT yarn made by spinning a CNT film. (b) Transmission electron microscopy (TEM) image of the CNT film used for spinning the yarn, consisting of mainly single-walled nanotube bundles. (c) Scanning electron microscopy (SEM) image of the CNT yarn showing a straight and uniform segment. (d,e,f) SEM images of the CNT yarns with increasing magnifications, showing tightly twisted CNT bundles. (g) Stress-strain curve of a CNT yarn with 30 μm diameter showing a tensile strength of >300 MPa. Inset, current-voltage curve of the CNT yarn showing an electrical resistivity ( $\rho$ ) of  $5.7 \times 10^{-4} \Omega \cdot \text{cm}$ .
